# Supplementary material for: Human subcortical brain asymmetries in 15,847 people worldwide reveal effects of age and sex
Source: Springer Nature journal article supplement (doi:10.1007/s11682-016-9629-z), 2016-10-13
Supplement: MOESM1 [file 11682_2016_9629_MOESM1_ESM.pdf]

Supporting Information S1. Boxplots show the age distributions per cohort. The datasets are ordered vertically by median age, oldest at the top. On the  $x$ -axis are the age values (in years). The horizontal length of each box represents the age at the 2nd and 3rd quartile of their distribution (thus containing half the respective dataset). The vertical width of the boxes is proportional to the square root of the dataset sample size. Boxes are split at the median age, and the whiskers reach to the minimum and maximum ages.

# Age distributions per dataset

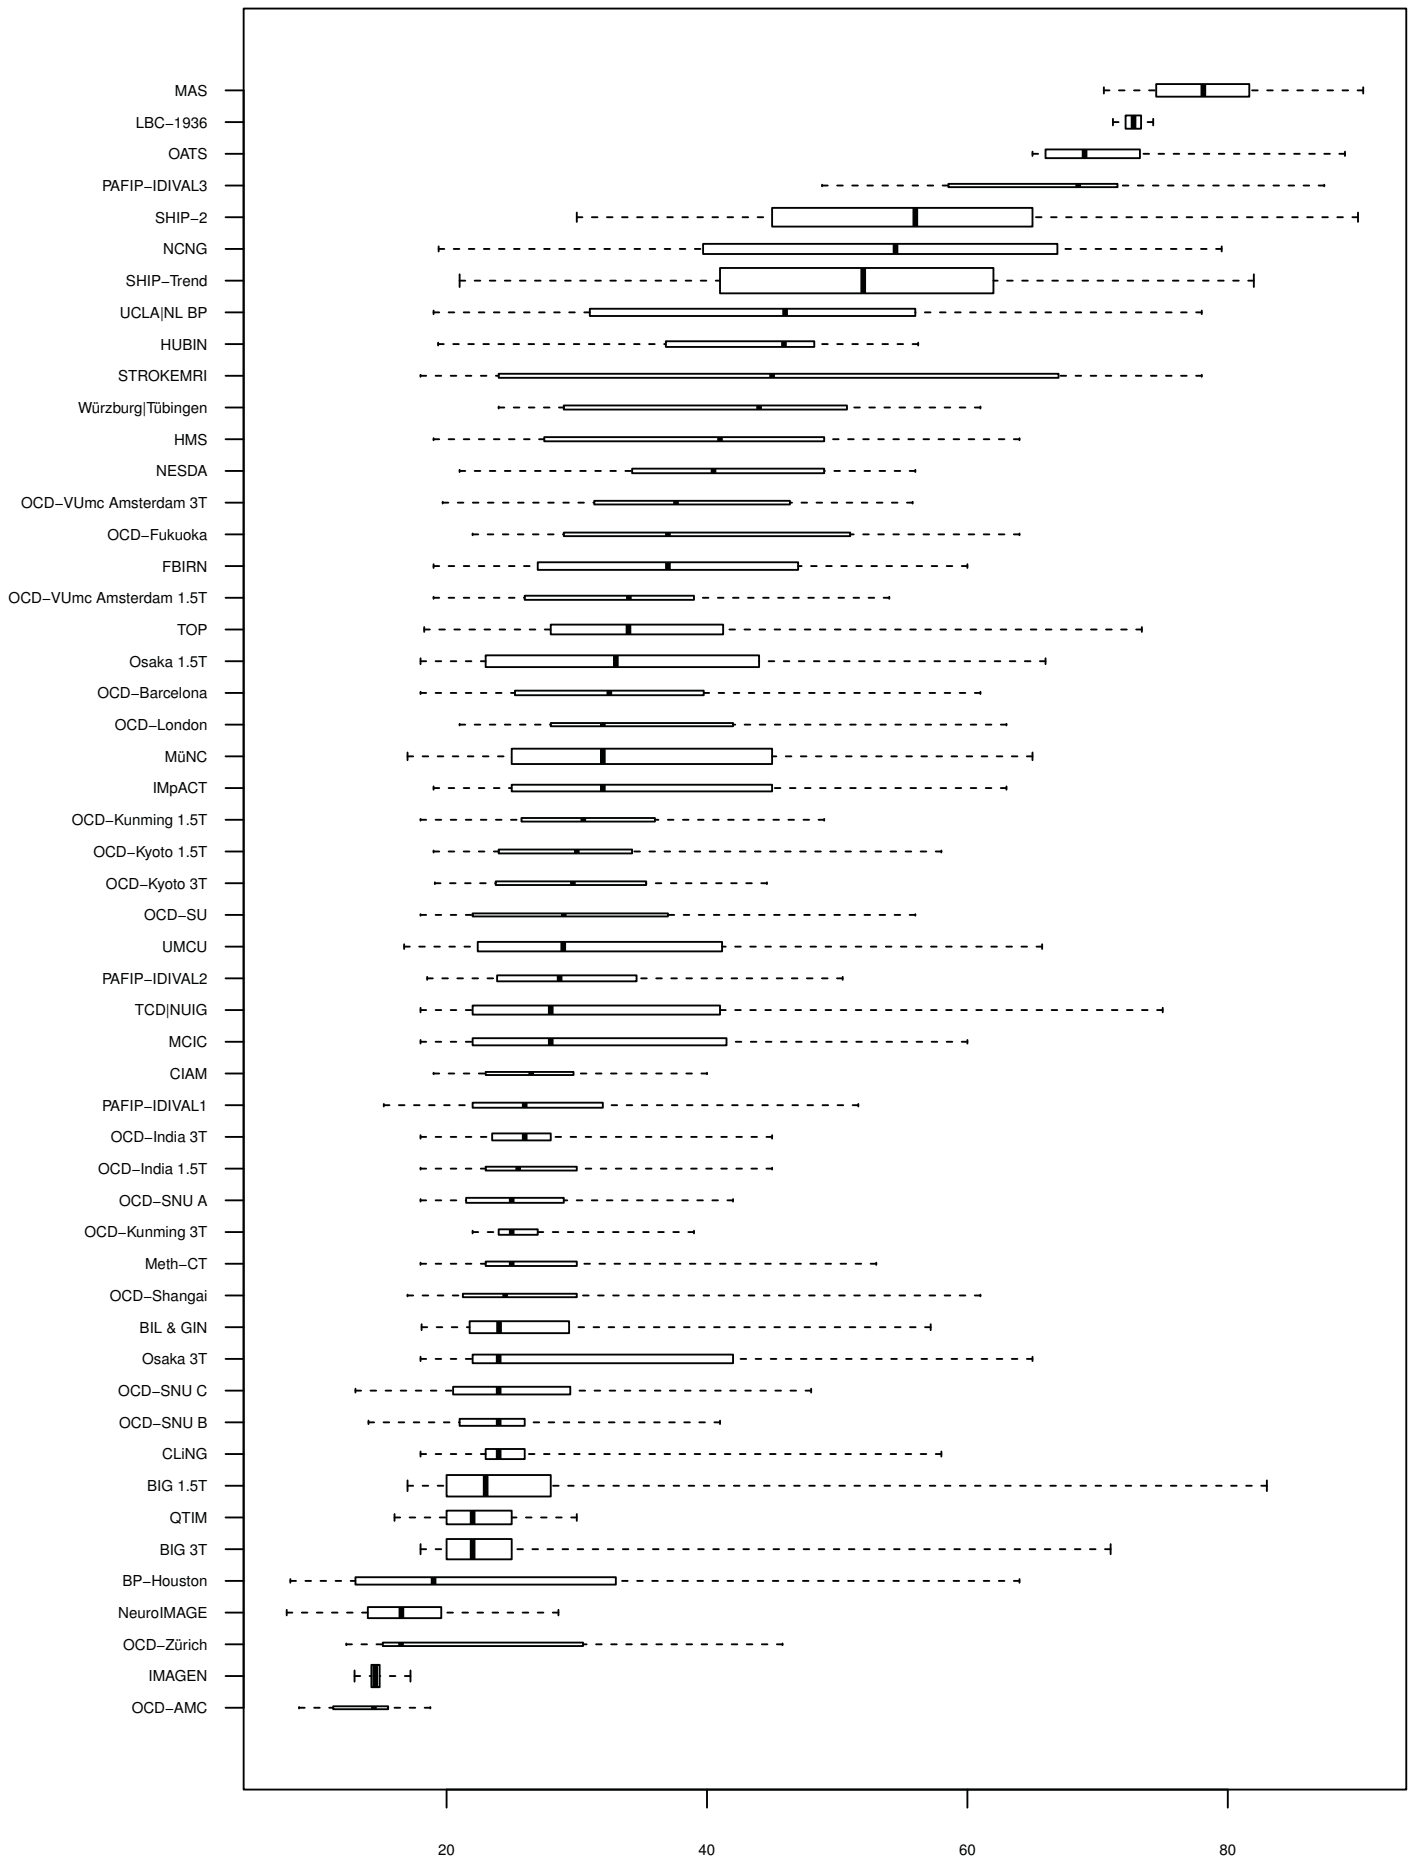

Supplementary Table S2: Dataset description and MR image acquisition details. On the left column are the reference numbers as used in Table 1, Figures 2, 3 and Supplementary Material S5.

Table with columns: Reference number, Dataset, Description, Scanner(s), FreeSurfer version, and T1 acquisition details. The table lists 52 different datasets, including Big 1.5T, Big 3T, Bil & Gin, Bp-Houston, CiAm, Cling, FbRrn, Hms, Hubin, Imagegn, Impact, Lbc-1936, Mas, Mcic, Meth-ct, Minc, Ncng, Nesda, Neuroimage, Oats, Ocd-amc, Ocd-barcelona, Ocd-fukuoka, Ocd-india 1.5t, Ocd-india 3t, Ocd-kunming 1.5t, Ocd-kunming 3t, Ocd-kyoto 1.5t, Ocd-kyoto 3t, Ocd-london, Ocd-shanghai, Ocd-snu a, Ocd-snu b, Ocd-snu c, Ocd-snu, Ocd-umc-amsterdam 1.5t, Ocd-umc-amsterdam 3t, Ocd-zurich, Osa 1.5t, Osa 3t, Pafip-idiVal1, Pafip-idiVal2, Pafip-idiVal3, Qtim, Ship-2, Ship-4, Ship-7, Strokemri, Tcd/niug, Top, Ucla/InL NP, Umcu, and Wuirzburg|Tubingen.

Supplemental Information S3. List of datasets (arranged alphabetically) on which handedness analyses were performed, corresponding sample sizes and assessment methods.

| Dataset                 | Left handed | Right handed | Assessment                                                                                                           |
|-------------------------|-------------|--------------|----------------------------------------------------------------------------------------------------------------------|
| BIG 1.5T                | 67          | 1205         | Self-report                                                                                                          |
| BIG 3T                  | 56          | 1150         | Self-report                                                                                                          |
| BIL & GIN               | 205         | 248          | Self-report                                                                                                          |
| CLiNG                   | 15          | 307          | Self report confirmed by Edinburgh Handedness Inventory                                                              |
| FBIRN                   | 5           | 173          | Self-report                                                                                                          |
| HMS                     | 7           | 44           | Self report confirmed by Edinburgh Handedness Inventory                                                              |
| HUBIN                   | 6           | 90           | Self-report                                                                                                          |
| IMAGEN                  | 160         | 1391         | Self report confirmed by Purdue Pegboard test                                                                        |
| IMpACT                  | 15          | 126          | Self-report                                                                                                          |
| LBC-1936                | 34          | 522          | Writing hand                                                                                                         |
| MCIC                    | 9           | 154          | Annett Scale of Hand Preference                                                                                      |
| MüNC                    | 14          | 729          | Edinburgh Handedness Inventory: A threshold of 12 (out of 14) items was used to categorize as left- or right-handed. |
| NCNG                    | 26          | 301          | Self-report                                                                                                          |
| NESDA                   | 5           | 61           | Self-report                                                                                                          |
| NeuroIMAGE              | 45          | 333          | Self-report                                                                                                          |
| OCD-VUmc Amsterdam 1.5T | 6           | 48           | Self-report                                                                                                          |
| OCD-VUmc Amsterdam 3T   | 7           | 31           | Self-report                                                                                                          |
| Osaka 1.5T              | 28          | 409          | Self report confirmed by Edinburgh Handedness Inventory                                                              |
| Osaka 3T                | 11          | 226          | Self report confirmed by Edinburgh Handedness Inventory                                                              |
| SHIP-2                  | 57          | 1053         | Self-report                                                                                                          |
| SHIP-Trend              | 97          | 1943         | Self-report                                                                                                          |
| STROKEMRI               | 6           | 46           | Self-report                                                                                                          |
| TOP                     | 22          | 279          | Self-report                                                                                                          |
| UCLA NL BP              | 20          | 140          | Self-report                                                                                                          |
| UMCU                    | 36          | 227          | Self-report                                                                                                          |

## Supplemental Information S4 : Left-right flip checks

Of special importance was to assure the correct correspondence between the left/right orientation of the processed image data and the original subject space. In contrast to the other axes (antero-posterior or superior-inferior), the correct orientation on the left-right axis is not directly identifiable from visual features, making it difficult to readily detect any erroneous image flips during processing. Such problems are much more unlikely since the adoption of the nifti imaging standard (<http://nifti.nimh.nih.gov/>), but they can still be a potential source of artifact if the raw (often DICOM-formatted) data is processed with incorrect assumptions (SPM documentation, p. 157; <http://www.fil.ion.ucl.ac.uk/spm/doc/manual.pdf>).

Because the ENIGMA protocol starts after the raw (often DICOM-formatted) data has been converted into an imaging standard (or converted by FreeSurfer itself), this meant that conversion from the DICOM format was the most likely step where any error could have taken place. This was assessed using several strategies, depending on the available information at each site. The **BIL & GIN**, **FBIRN**, **MAS**, **NESDA** and **OATS** samples had made use of paramagnetic fiducial markers on a subset of their subjects, thus eliminating orientation ambiguity. In **QTIM** and **SHIP**, subjects with a known unilateral brain abnormality were used to check the correct orientation of the image after conversion. In **BIG**, **CLING**, **HMS** and **OCD-SU**, a few examples were manually checked for mismatches between the DICOM and nifti header information, i.e. a correct flip from 'radiological' to 'neurological' orientation. Finally, we checked the consistency between several, commonly used, DICOM to nifti conversion tools and DICOM images generated from different manufacturers/models (using examples downloaded from the manufacturer's websites). The convertors used in this step were: "mri\_convert" ([https://surfer.nmr.mgh.harvard.edu/pub/docs/html/mri\\_convert.help.xml.html](https://surfer.nmr.mgh.harvard.edu/pub/docs/html/mri_convert.help.xml.html)), "MRIConvert" (<http://lcn.uoregon.edu/downloads/mriconvert>), "dcm2nii" (<http://www.cabiatl.com/mricro/mricron/dcm2nii.html>) and "spm\_dicom\_convert" (<http://www.fil.ion.ucl.ac.uk/spm/>).

Given that these checks yielded no problems, and that the datasets where no error was detected comprised 60% of the total meta-analysis sample, we were confident that such orientation errors must have been very unlikely.

### **Supplementary Information S5.**

Plots of the relationship between ICV and subcortical AIs in the BIG 3T sample. Regression analyses of linear and quadratic relationships revealed only linear effects of ICV with AIs of the nucleus accumbens, caudate nucleus and putamen (as indicated by the dashed lines).

**N. accumbens AI against ICV**

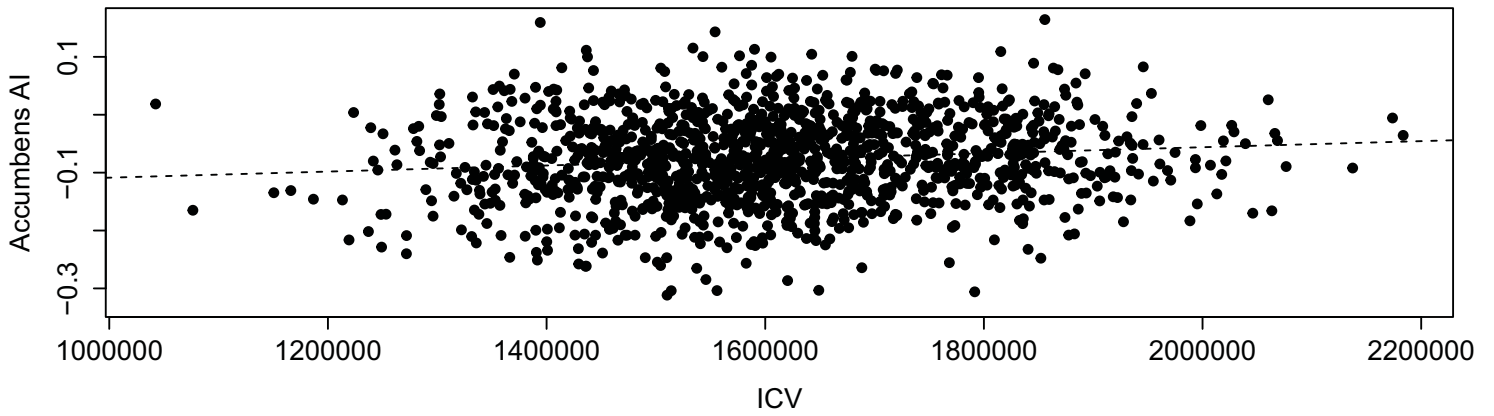

**Amygdala AI against ICV**

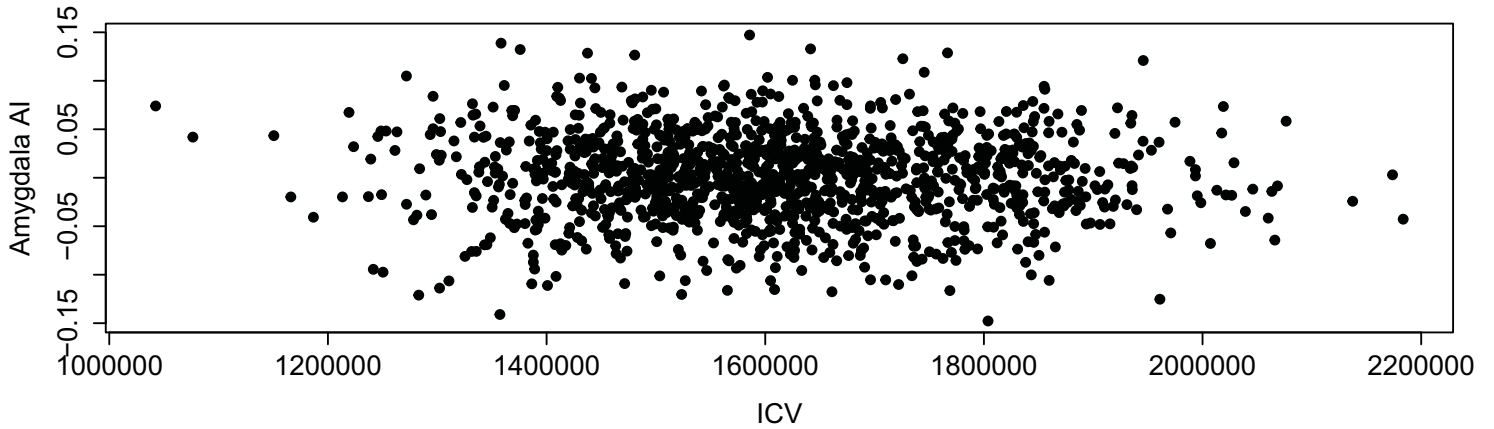

**Thalamus AI against ICV**

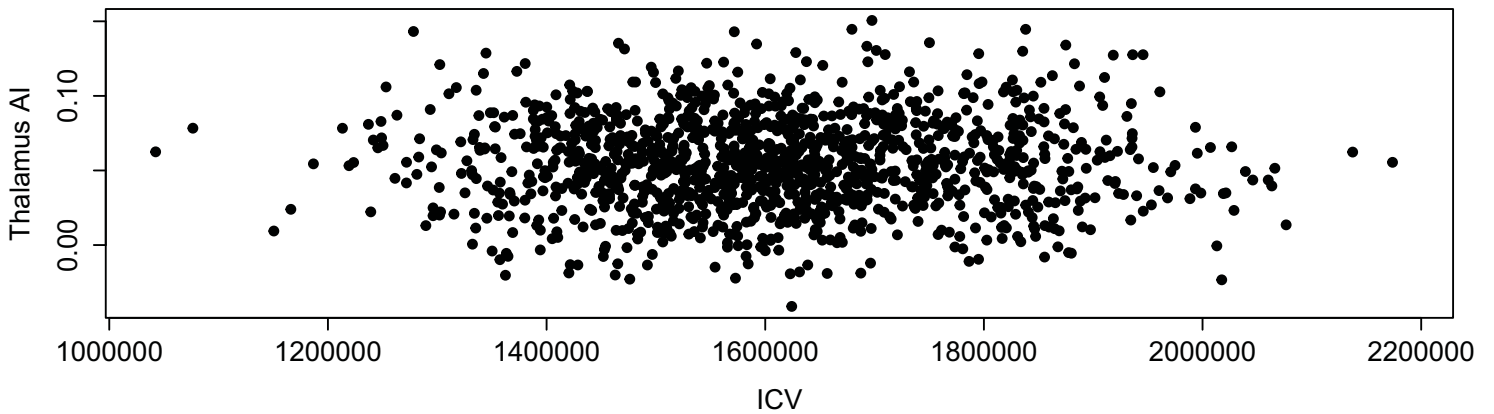

**Caudate N. AI against ICV**

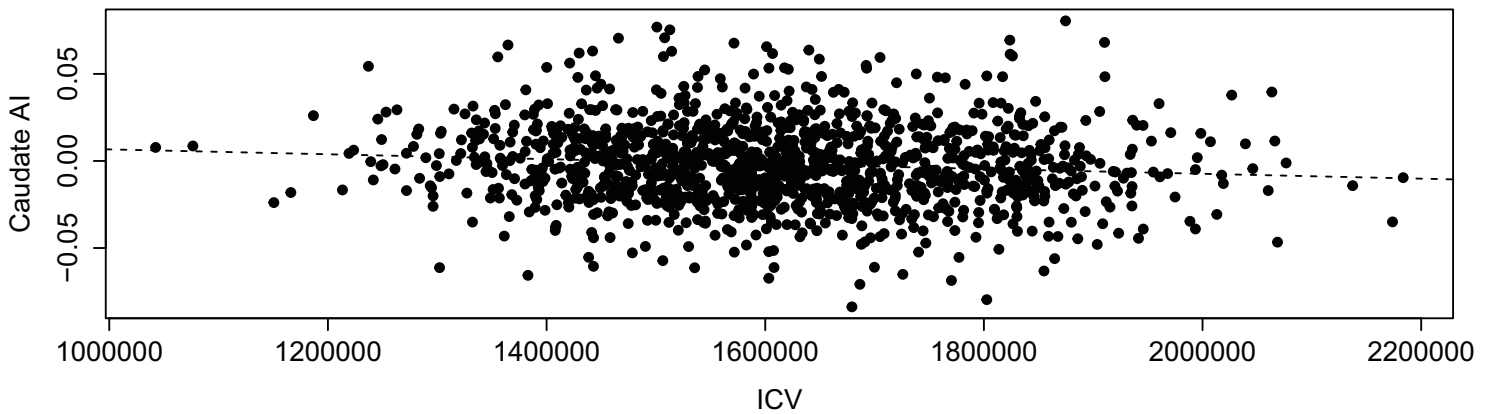

**Putamen AI against ICV**

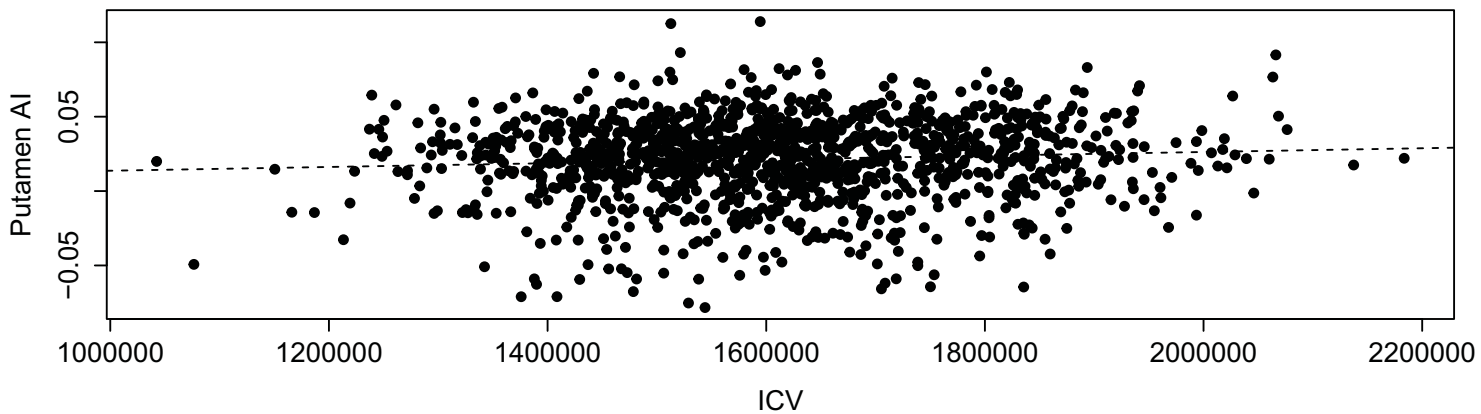

**Globus Pallidus AI against ICV**

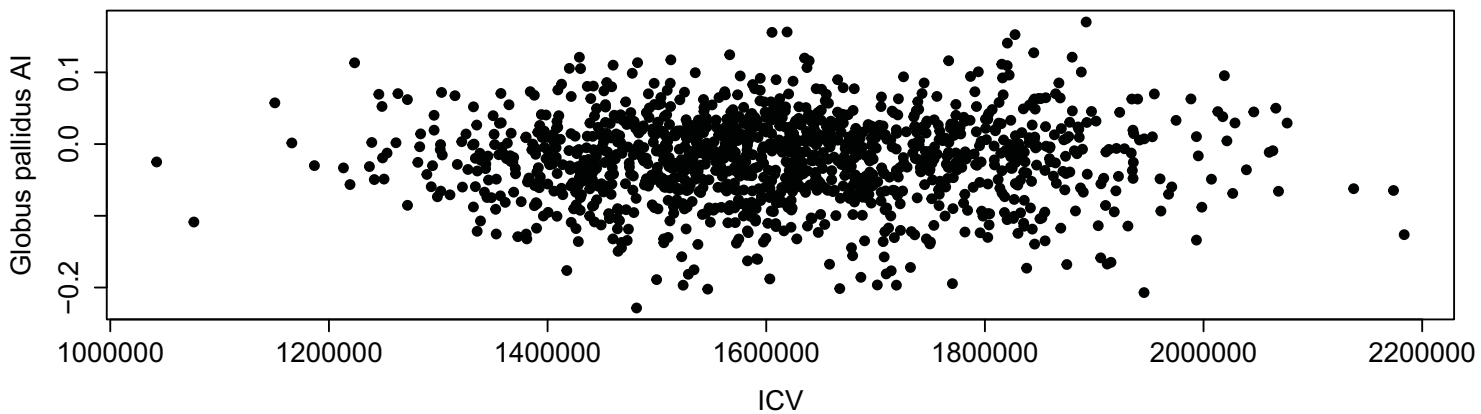

**Hippocampus AI against ICV**

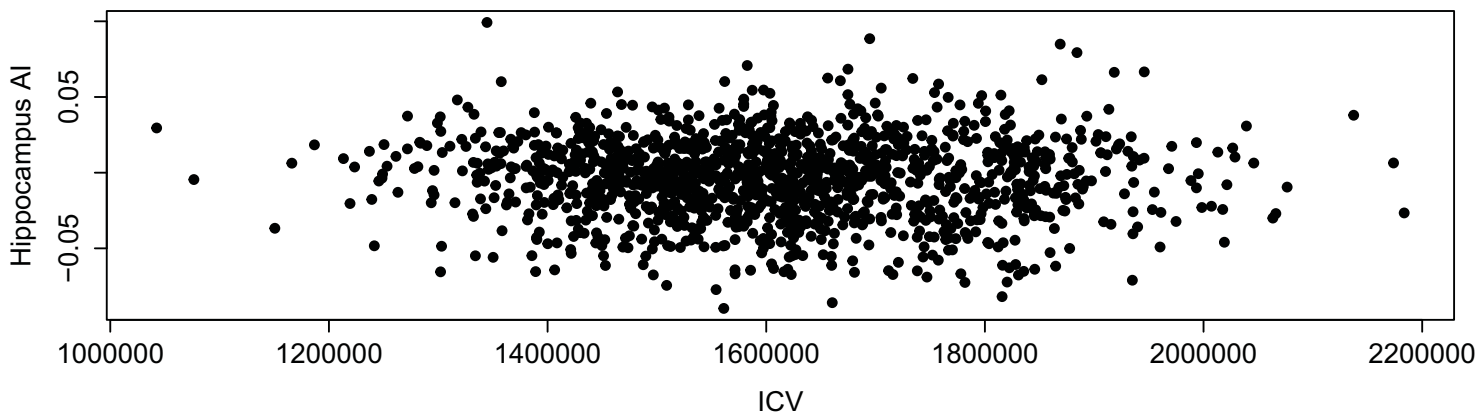



### **Supplementary Information S6.**

Boxplots of AI distributions for each dataset and structure. For each structure, the datasets are ordered top-to-bottom by their median AIs. The identities of the datasets are given by the numbers in the lefthand columns, with reference to Table 1. The horizontal length of each box represents the 2nd to 3rd quartile of the AI distribution (i.e. containing half of subjects in each dataset) and split at the median AI. The vertical width of each dataset's box is proportional to the square root of its sample size. The whiskers show the minimum and maximum values (curtailed in cases where the outer box boundary was reached). The vertical dotted lines indicate the points of perfect symmetry,  $AI=0$ .

**N. accumbens**

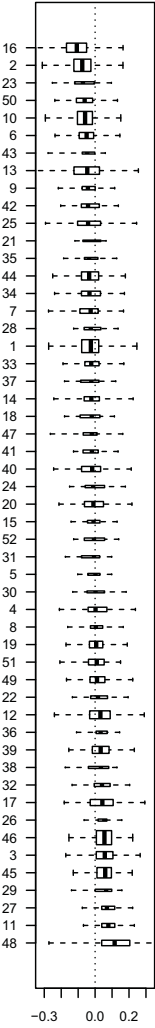

**Amygdala**

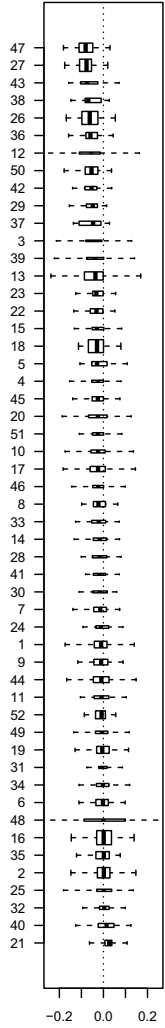

**Caudate N.**

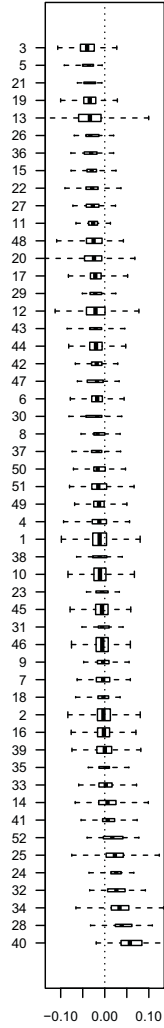

**Globus pallidus**

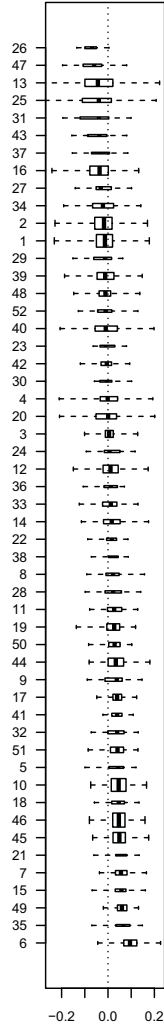

**Hippocampus**

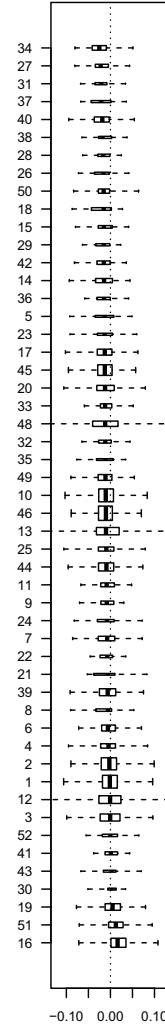

**Putamen**

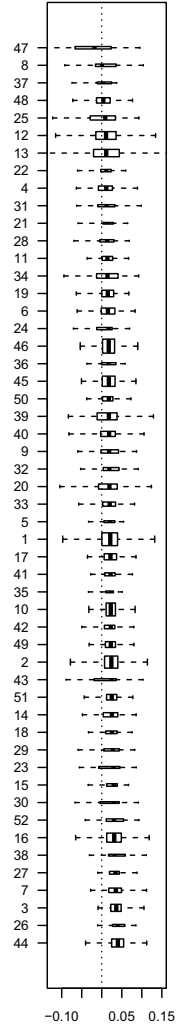

**Thalamus**

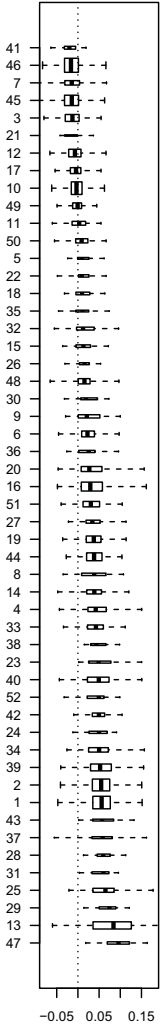

Supporting Information S7. Meta-analyzed results from testing population-level lateralization (mean AI's  $\neq 0$ ) separately by sex. A positive Z-score indicates leftward asymmetry in volume (L>R), while a negative Z-score reflects a rightward asymmetry (R>L).

| Females           | N    | z-score | Males             | N    | z-score |
|-------------------|------|---------|-------------------|------|---------|
| Nucleus accumbens | 7957 | -11.01  | Nucleus accumbens | 7053 | -4.80   |
| Amygdala          | 8049 | -33.36  | Amygdala          | 7118 | -32.72  |
| Caudate nucleus   | 7980 | -34.92  | Caudate nucleus   | 7125 | -31.12  |
| Globus pallidus   | 7892 | 23.61   | Globus pallidus   | 7040 | 31.16   |
| Hippocampus       | 7971 | -22.67  | Hippocampus       | 7075 | -20.14  |
| Putamen           | 7920 | 59.86   | Putamen           | 7041 | 53.16   |
| Thalamus          | 8043 | 41.43   | Thalamus          | 7115 | 33.44   |

| Phenotype 1    | Phenotype 2    | Phenotype correlation | Phenotype correlation P | Genetic correlation | Genetic correlation P |
|----------------|----------------|-----------------------|-------------------------|---------------------|-----------------------|
| AI_amygdala    | AI_accumbens   | 0.00                  | 0.90028                 | -0.99               | 0.0126487             |
| AI_amygdala    | AI_caudate     | 0.10                  | 0.0001192               | 0.85                | 0.0914741             |
| AI_amygdala    | AI_hippocampus | 0.00                  | 0.9357421               | -0.81               | 0.0356209             |
| AI_amygdala    | AI_pallidum    | 0.03                  | 0.2340173               | -0.42               | 0.3471581             |
| AI_amygdala    | AI_putamen     | 0.09                  | 0.0005557               | 0.13                | 0.716055              |
| AI_amygdala    | AI_thalamus    | -0.06                 | 0.0209367               | -0.10               | 0.7943838             |
| AI_caudate     | AI_accumbens   | -0.08                 | 0.0040859               | 0.32                | 0.3575671             |
| AI_caudate     | AI_hippocampus | -0.03                 | 0.3293978               | -0.36               | 0.2211863             |
| AI_caudate     | AI_pallidum    | 0.05                  | 0.0393021               | -0.11               | 0.752416              |
| AI_caudate     | AI_putamen     | 0.12                  | 4.46E-06                | -0.14               | 0.6170061             |
| AI_caudate     | AI_thalamus    | 0.04                  | 0.1032485               | 0.31                | 0.3141842             |
| AI_hippocampus | AI_accumbens   | 0.00                  | 0.9842037               | -0.11               | 0.6521278             |
| AI_hippocampus | AI_pallidum    | 0.02                  | 0.4847126               | 0.10                | 0.6775807             |
| AI_hippocampus | AI_putamen     | 0.01                  | 0.7405954               | 0.04                | 0.8433021             |
| AI_hippocampus | AI_thalamus    | 0.11                  | 3.29E-05                | 0.10                | 0.6507085             |
| AI_pallidum    | AI_accumbens   | 0.07                  | 0.0068105               | 0.18                | 0.5735795             |
| AI_pallidum    | AI_putamen     | 0.05                  | 0.0446912               | -0.12               | 0.6430572             |
| AI_pallidum    | AI_thalamus    | -0.21                 | 7.16E-16                | -0.26               | 0.3783415             |
| AI_putamen     | AI_accumbens   | -0.02                 | 0.4199311               | -0.61               | 0.0202141             |
| AI_putamen     | AI_thalamus    | -0.26                 | 8.26E-23                | -0.48               | 0.0365587             |
| AI_thalamus    | AI_accumbens   | -0.05                 | 0.0873988               | -0.14               | 0.6142865             |

**Supplementary Information S8.** Phenotypic and genetic correlations among AIs in the GOBS dataset.
